# Supplementary material
Source: ML conference proceedings conference paper supplement (https://openreview.net/forum?id=l4jBHP4FPy)
Supplement: supplementary_material [file attachment]

The code of Fourier Analysis Networks (FAN) is available at:

<https://anonymous.4open.science/r/Fourier-Analysis-Networks-6B6D>
